# Supplementary material
Source: publisher figshare collection journal article supplement (https://aacr.figshare.com/articles/dataset/_/22490330)
Supplement: Supplementary file 1 [file 39941963]

**Fig. S3**

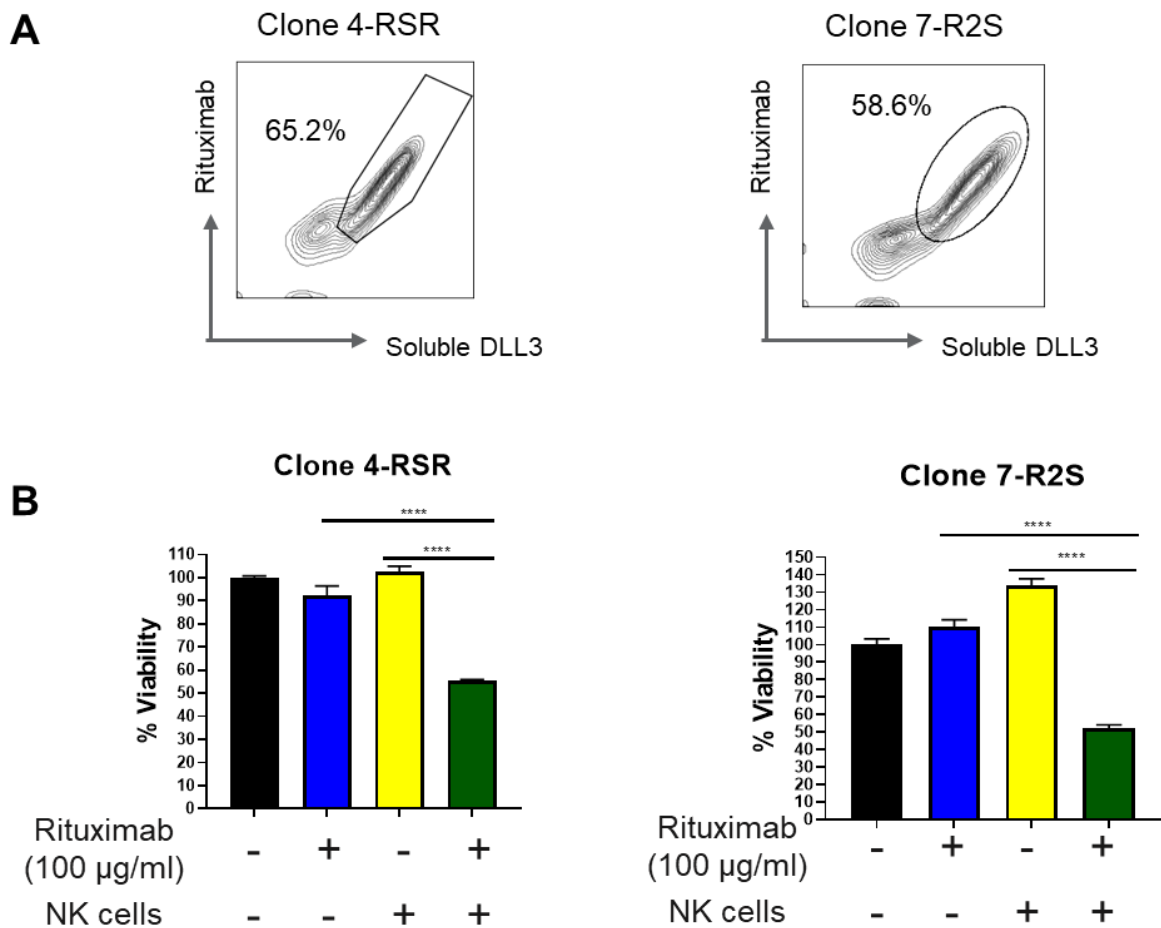

**Fig. S3. DLL3 CAR T cells with rituximab off-switch can be detected by rituximab and eliminated by ADCC.** (A) T cells transduced with clone 4-RSR or clone 7-R2S can be detected by co-staining of rituximab and soluble DLL3. (B) T cells transduced with clone 4-RSR or clone 7-R2S were depleted in antibody-dependent cellular cytotoxicity (ADCC) assay. NK cells were purified from PBMCs and activated with 1000 IU/ml IL-2 for 3 days and then incubated with freshly thawed CAR T cells for 24 hours with or without rituximab (100 µg/ml). Live CAR+ cells were counted on flow cytometer at the end of the assay. Groups were analyzed by using One Way ANOVA with Tukey's correction for multiple comparisons (\*\*\*\*,  $p < 0.0001$ ,  $n=3$ ). Error bars represent SEM.
